# Supplementary material for: Isolation and Characterization of a Thermophilic, Obligately Anaerobic and Heterotrophic Marine Chloroflexi Bacterium from a Chloroflexi-dominated Microbial Community Associated with a Japanese Shallow Hydrothermal System, and Proposal for Thermomarinilinea lacunofontalis gen. nov., sp. nov
Source: PubMed Central journal article supplement (PMC4070665; doi:10.1264/jsme2.me12193), 2013-05-11
Supplement: 28_228_s1.pdf [file 28_228_s1.pdf]

## Supplementary text

### Materials and methods

#### Composition of media used in this study

MJYPS medium (Takai et al. 2000)

Modified MJ synthetic seawater with yeast extract (0.1 %, w/v), trypticase peptone (0.1 %), elemental sulfur (0.3 %), resazurin (0.0001 %), and neutralized Na<sub>2</sub>S 9H<sub>2</sub>O (final 0.05 %). Head space gas was N<sub>2</sub> (100 kPa).

MMJ medium (Takai et al. 2002)

Modified MJ synthetic seawater with vitamin mixture (0.1 %, v/v) (Balch et al. 1979), resazurin (0.0001 %), NaHCO<sub>3</sub> (0.2 %), cysteine hydrochloride (0.05 %) and 0.5 g Na<sub>2</sub>S 9H<sub>2</sub>O 0.05 %. Head space gas was a mixture of 80% H<sub>2</sub> : 20% CO<sub>2</sub> (200 kPa).

MMJSO medium (Nunoura et al. 2007b)

Modified MJ synthetic seawater supplemented with yeast extract (0.02 %, w/v), sodium lactate (0.05 %), sodium pyruvate (0.05 %), sodium ascorbate (0.05 %), NaHCO<sub>3</sub> (0.1 %), Na<sub>2</sub>SO<sub>4</sub> (0.2 %, w/v, added to MJ synthetic seawater) and resazurin (0.0001 %). The pH was adjusted to 7. A gas mixture of 80% H<sub>2</sub> : 20% CO<sub>2</sub> (200 kPa) was used for head-space gas.

MMJS medium (Nunoura et al. 2008)

Modified MJ synthetic seawater with vitamin mixture (0.1 %, v/v) (Balch et al. 1979), resazurin (0.0001 %), NaHCO<sub>3</sub> (0.2 %), elemental sulfur (3%) and 0.5 g Na<sub>2</sub>S 9H<sub>2</sub>O 0.05 %. A gas mixture of 80% H<sub>2</sub> : 20% CO<sub>2</sub> (200 kPa) was used for head-space gas.

MMJHS medium (Takai et al. 2003)

Modified MJ synthetic seawater with vitamin mixture (0.1 %, v/v) (Balch et al. 1979), sodium thiosulfate (0.1%) and elemental sulfur (0.3%), but with sodium nitrate (0.1%) in the absence of headspace O<sub>2</sub>. Three types of head space gases of 80%

H<sub>2</sub> and 20% CO<sub>2</sub> (200 kPa), and 79% H<sub>2</sub>, 20% CO<sub>2</sub> and 1% O<sub>2</sub> (200 kPa) were used in this study.

MMJYPS medium (Nunoura et al. 2007a)

Modified MJ synthetic seawater, yeast extract (0.1%), tryptone peptone (0.1%), sulfur (0.3%), and resazurin (0.0001 %), at a pH adjusted to around 5.5. Head space gas was a mixture of 80% H<sub>2</sub> : 20% CO<sub>2</sub> (200 kPa)

MJY medium (Nunoura et al. 2010)

Modified MJ synthetic seawater with yeast extract (0.1 %, w/v), resazurin (0.0001 %), and neutralized Na<sub>2</sub>S 9H<sub>2</sub>O (final 0.05 %). Head space gas was N<sub>2</sub> (100 kPa).

### Supplementary figures

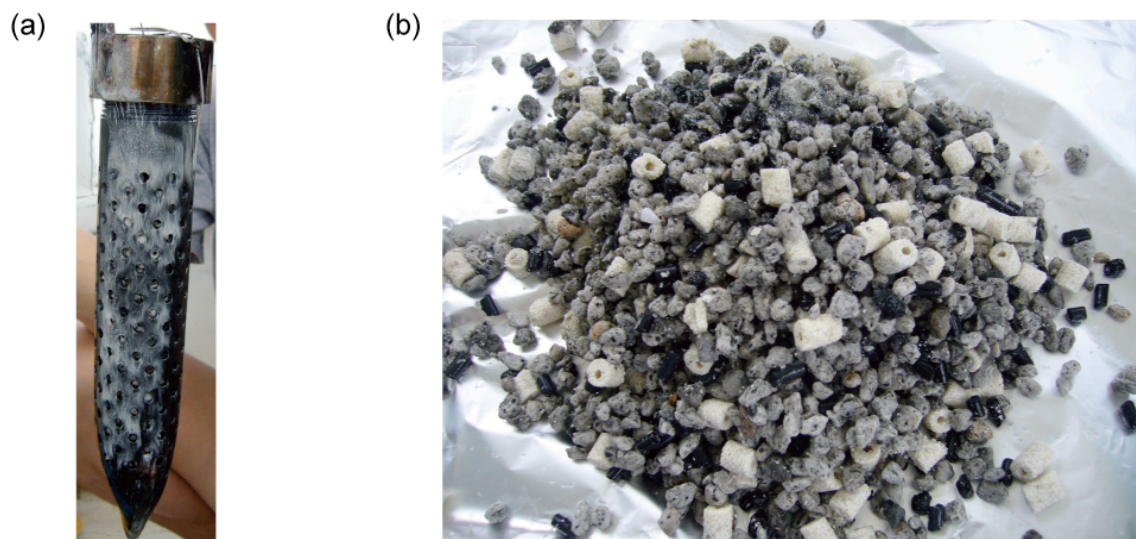

**Figure S1.** (a) Appearance of *in situ* colonization system (ISCS) after 5 days of incubation in a hydrothermal vent emission. Inner diameter and inner length of the ISCS were 45 and 250 mm, respectively. Filamentous white microbial mat formations were observed. (b) Pumiceous stuffing settled in the ISCS after the 5 day of incubations. Outer diameter and length of the white rings were 6 and 9 mm, respectively.

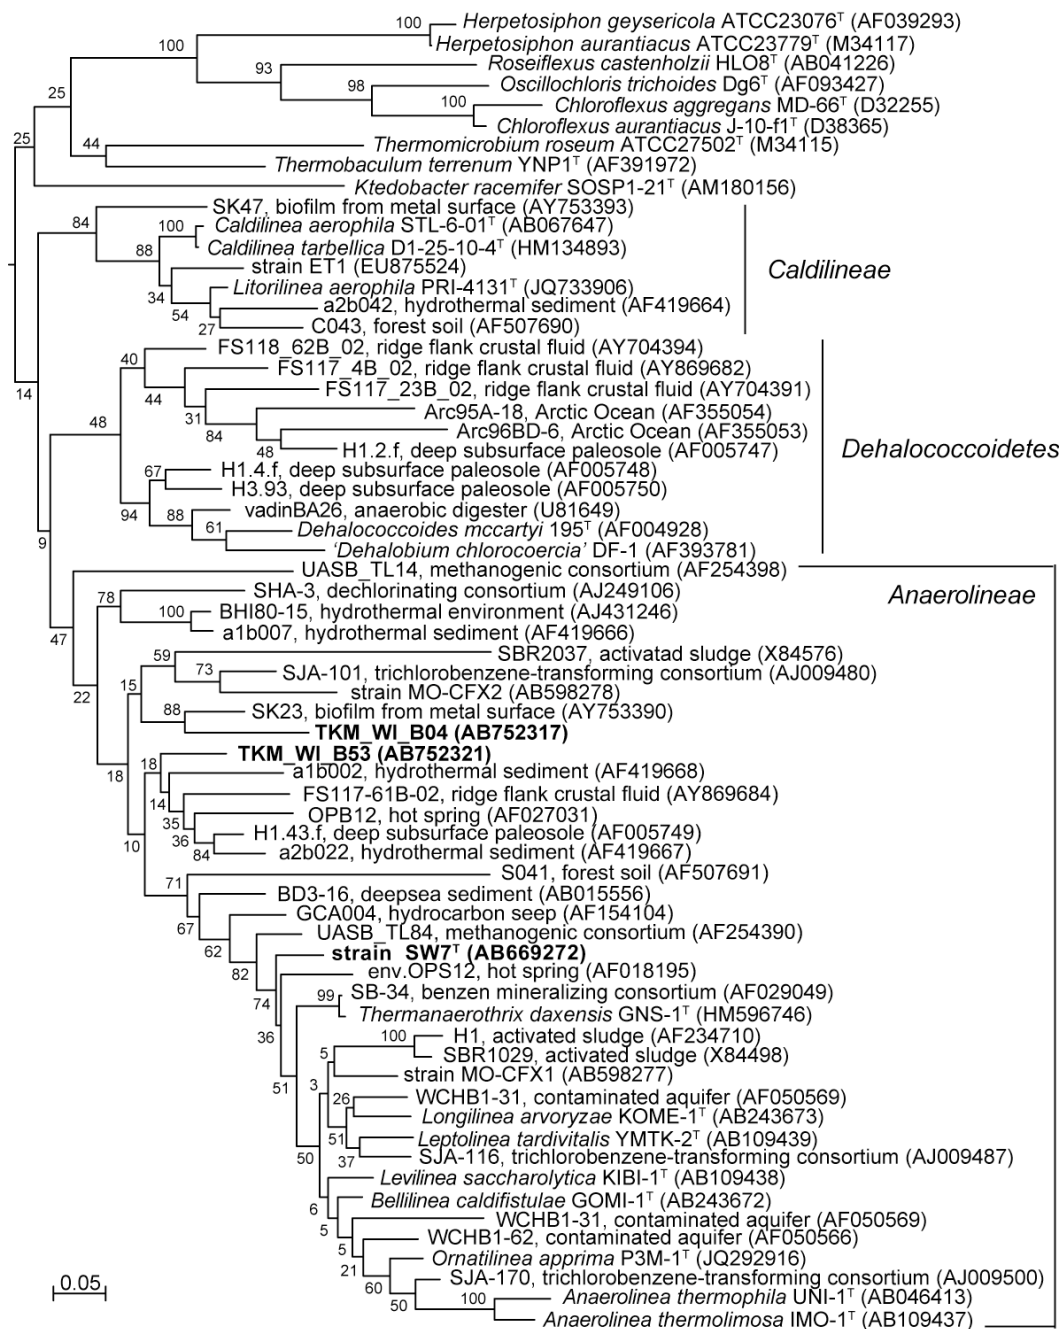

**Figure S2.** Phylogenetic tree of the phylum *Chloroflexi* based on SSU rRNA gene sequence by PhyML using 707 homologous sequence positions. Bold indicate the sequences obtained in this study. Numbers indicate bootstrap values from 100 trials. Numbers in parentheses are GenBank/EMBL/DDBJ accession number. Bar indicates 5 substitutions per 100 nucleotides. *Desulfovibrio vulgaris* DSM644 (M34399) was used for an out-group.

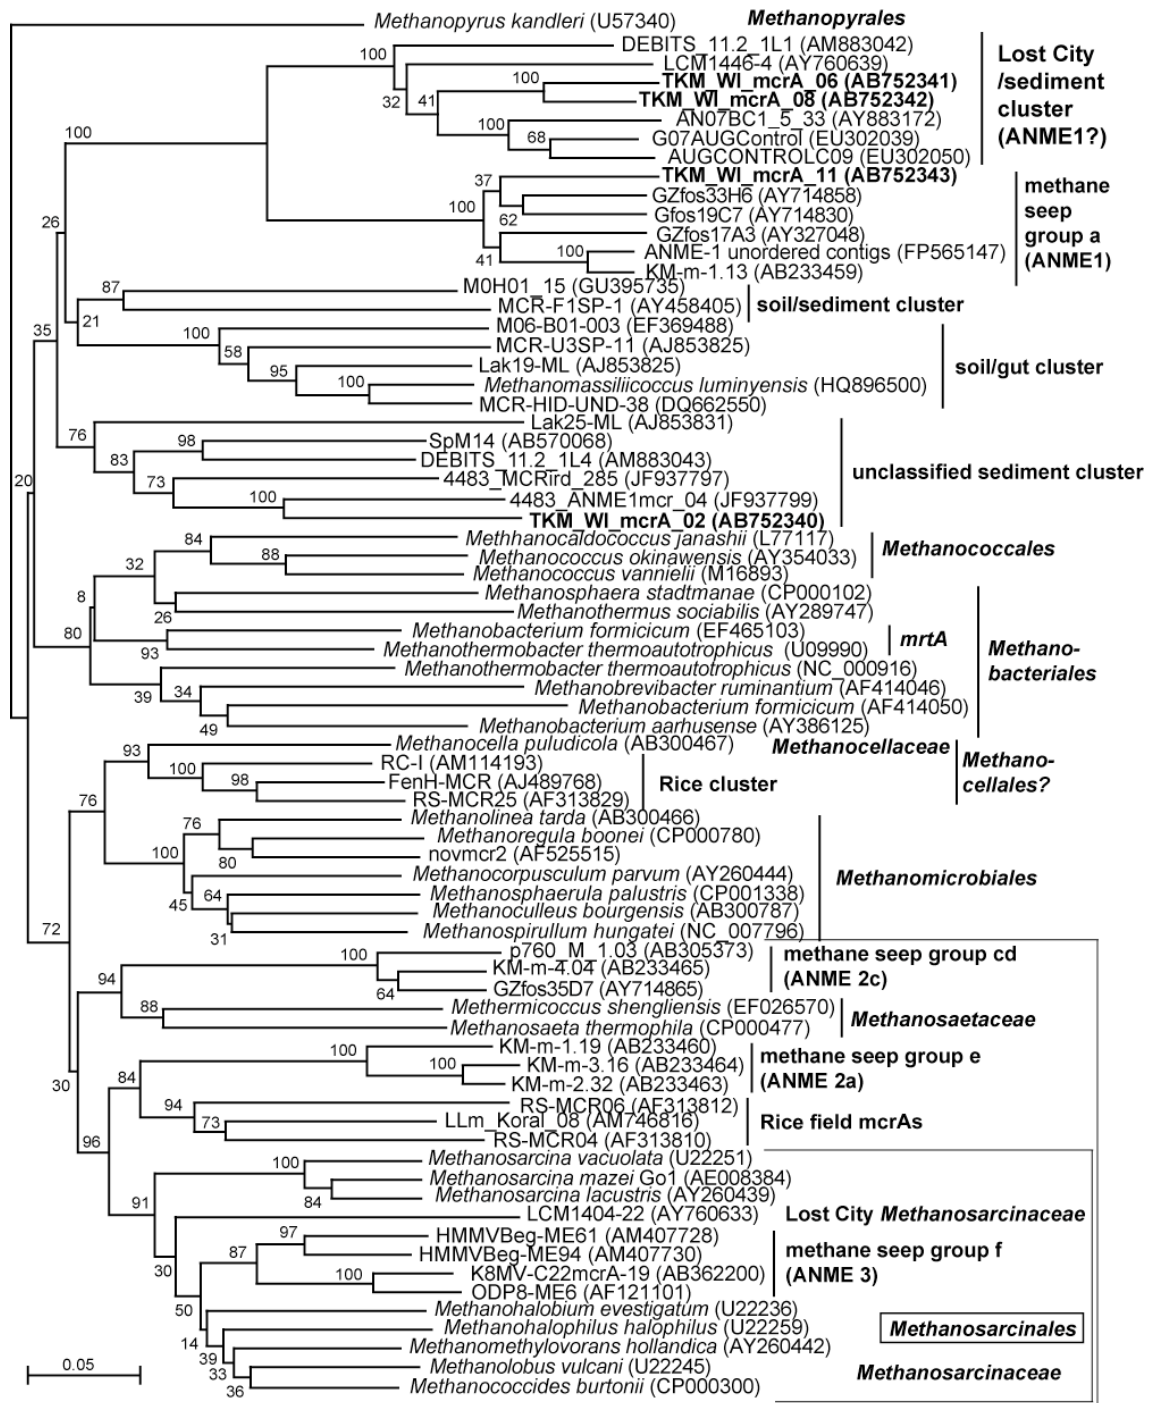

**Figure S3.** Phylogenetic tree of the *mcrA* nucleotide sequences by neighbor-joining method. Bold indicate the sequences obtained in this study. Numbers indicate bootstrap values from 100 trials. Numbers in parentheses are GenBank/EMBL/DBJ accession number. Bar indicates 5 substitutions per 100 nucleotides.

Table S1. Sequences of primers and probes, and PCR conditions used in this study.

| Target gene                                 | Primer   | Sequence (5' 3')          | PCR condition                                                            | Reference                                 |
|---------------------------------------------|----------|---------------------------|--------------------------------------------------------------------------|-------------------------------------------|
| <b>Clone analyses for environmental DNA</b> |          |                           |                                                                          |                                           |
| archaeal SSU rRNA gene                      | A21F     | TTCCGGTTGATCCYGCCGGA      | 96°C for 1min, 30 x (96°C 25s, 50°C 45s, 72°C 90s)                       | DeLong 1992                               |
|                                             | U907R    | CCCGTCAATTCCTTTGAGTTT     |                                                                          |                                           |
| bacterial SSU rRNA gene                     | B27F     | AGAGTTTGATCCTGGCTCAG      | 96°C for 1min, 25 x (96°C 25s, 53°C 45s, 72°C 90s)                       | Lane 1985                                 |
|                                             | U907R    | CCCGTCAATTCCTTTGAGTTT     |                                                                          |                                           |
| <i>mcrA</i>                                 | ME3MF    | ATGTCNGGTGGHGTMGGSSTTYAC  | 94 °C for 2 min, 35 x (94°C for 40 s, 52°C for 30 s, and 72°C for 1 min) | Hales et al. 1996,<br>Nunoura et al. 2008 |
|                                             | ME2r'    | TCATBGCRTAGTTDGGRTAGT     |                                                                          |                                           |
| <b>Quantitative PCR</b>                     |          |                           |                                                                          |                                           |
| prokaryotic SSU rRNA gene                   | Uni340F  | CCTACGGGRRBGCASCAG        | 96°C for 1min, 50 x (96°C 25s, 57°C 6min)                                | Takai & Horikoshi 2000                    |
|                                             | Uni516F  | TGYCAGCMGCCCGGTAHAHACVNRS |                                                                          |                                           |
|                                             | Uni806R  | GGACTACNNGGGTATCTAAT      |                                                                          |                                           |
|                                             | Arch349F | GYGCASCAGKCGMGAAW         |                                                                          |                                           |
| archaeal SSU rRNA gene                      | Arch516F | TGYCAGCCGCCCGGTAHAHACCVGC | 96°C for 1min, 50 x (96°C 25s, 59°C 6min)                                | Takai & Horikoshi 2000                    |
|                                             | Arch806R | GGACTACVSGGGTATCTAAT      |                                                                          |                                           |
|                                             | ME3MF    | ATGTCNGGTGGHGTMGGSSTTYAC  |                                                                          |                                           |
|                                             | ME2r'    | TCATBGCRTAGTTDGGRTAGT     |                                                                          |                                           |
| <i>mcrA</i>                                 |          |                           | 94 °C for 2 min, 40 x (94°C for 40 s, 52°C for 30 s, and 72°C for 1 min) | Hales et al. 1996,<br>Nunoura et al. 2008 |
|                                             |          |                           |                                                                          |                                           |
|                                             |          |                           |                                                                          |                                           |
|                                             |          |                           |                                                                          |                                           |
| <b>Amplification for isolates</b>           |          |                           |                                                                          |                                           |
| archaeal SSU rRNA gene                      | A21F     | TTCCGGTTGATCCYGCCGGA      | 96°C for 1min, 30 x (96°C 25s, 50°C 45s, 72°C 2min)                      | DeLong 1992                               |
|                                             | U1492R   | ASGGNTACCTTGTACGACTT      |                                                                          |                                           |
| bacterial SSU rRNA gene                     | B27F     | AGAGTTTGATCCTGGCTCAG      | 96°C for 1min, 25 x (96°C 25s, 53°C 45s, 72°C 2min)                      | Lane 1985                                 |
|                                             | U1492R   | ASGGNTACCTTGTACGACTT      |                                                                          |                                           |



Table S2. Bacterial and archaeal SSU rRNA gene community structures associated with ISCS deployed in the main vent of the Taketomi hydrothermal field.

(A) *Bacteria*

| Taxon                      | Phylotype  | Number of sequences | Accession number |
|----------------------------|------------|---------------------|------------------|
| <i>Chloroflexi</i>         | TKM_WI_B04 | 13                  | AB752317         |
|                            | TKM_WI_B53 | 1                   | AB752321         |
| <i>Deltaproteobacteria</i> | TKM_WI_B50 | 1                   | AB752319         |
|                            | TKM_WI_B60 | 6                   | AB752322         |
|                            | TKM_WI_B76 | 1                   | AB752328         |
| <i>Bacteroidetes</i>       | TKM_WI_B68 | 4                   | AB752326         |
|                            | TKM_WI_B75 | 1                   | AB752327         |
| <i>Deferribacterales</i>   | TKM_WI_B62 | 2                   | AB752323         |
| <i>Caldithrix</i> group    | TKM_WI_B63 | 1                   | AB752324         |
|                            | TKM_WI_B65 | 1                   | AB752325         |
| <i>Thermaceae</i>          | TKM_WI_B08 | 3                   | AB752318         |
| <i>Gammaproetobacteria</i> | TKM_WI_B52 | 1                   | AB752320         |
| Total                      |            | 35                  |                  |

(B) *Archaea*

| Taxon/division           | Phylotype  | Number of sequences | Accession number |
|--------------------------|------------|---------------------|------------------|
| <i>Euryarchaeota</i>     |            |                     |                  |
| <i>Thermococcaceae</i>   | TKM_WI_A50 | 11                  | AB752331         |
|                          | TKM_WI_A70 | 1                   | AB752337         |
| DHVEG                    | TKM_WI_A52 | 11                  | AB752333         |
|                          | TKM_WI_A77 | 1                   | AB752338         |
| Lost City                | TKM_WI_A14 | 2                   | AB752329         |
| <i>Methanosarcinales</i> |            |                     |                  |
| MEG                      | TKM_WI_A51 | 1                   | AB752332         |
| SAGMEG                   | TKM_WI_A59 | 1                   | AB752334         |
| DHVE8                    | TKM_WI_A78 | 1                   | AB752339         |
| Other <i>Archaea</i>     |            |                     |                  |
| DSAG                     | TKM_WI_A49 | 3                   | AB752330         |
|                          | TKM_WI_A64 | 1                   | AB752335         |
| MCG                      | TKM_WI_A68 | 2                   | AB752336         |
| Total                    |            | 35                  |                  |

Table S3. *mcrA* gene community structures associated with ISCS deployed in the main vent of the Taketomi hydrothermal field.

| Phylogroup                    | Phylotype      | Number of sequences | Accession number |
|-------------------------------|----------------|---------------------|------------------|
| ANME I                        | TKM_WI_mcrA_11 | 8                   | AB752343         |
| ANME I-like cluster           | TKM_WI_mcrA_06 | 3                   | AB752341         |
|                               | TKM_WI_mcrA_08 | 7                   | AB752342         |
| unclassified sediment cluster | TKM_WI_mcrA_02 | 7                   | AB752340         |
| Total                         |                | 25                  |                  |

Table S4 . Viable numbers of representative strains obtained by serial dilution count cultivation analysis from the ISCS deployed in the main vent of the Taketomi hydrothermal field.

| Medium      | Incubation temperature                                        |                                                                        |                                                                                                                                            |
|-------------|---------------------------------------------------------------|------------------------------------------------------------------------|--------------------------------------------------------------------------------------------------------------------------------------------|
|             | 85 °C                                                         | 70 °C                                                                  | 55 °C                                                                                                                                      |
| MJYPS       | 1 x 10 <sup>6</sup><br>I.N.O. ( <i>Thermococcaceae</i> -like) | N.T.                                                                   | 1 x 10 <sup>7</sup><br><i>Thermomarinilinea</i> strain SW7 <sup>T</sup><br>(AB669272)<br><i>Thermococcus</i> sp. TKM-55-W7-A<br>(AB752314) |
| MMJ         | N.T.                                                          | -                                                                      | N.T.                                                                                                                                       |
| MMJSO       | 1 x 10<br><i>Thermotoga</i> sp. TKM-83SO-W1<br>(AB752310)     | 1 x 10 <sup>2</sup><br><i>Thermotoga</i> sp. TKM-70SO-W2<br>(AB752311) | 1 x 10 <sup>2</sup><br><i>Caminibacillus</i> sp. TKM-55SO-W2<br>(AB752312)                                                                 |
| MMJS        | -                                                             | -                                                                      | N.T.                                                                                                                                       |
| MJYHS       | -                                                             | 1 x 10<br>I. N.O.<br>1 x 10 <sup>2</sup>                               | -                                                                                                                                          |
| MJYHS O2-1% | -                                                             | <i>Persephonella</i> sp. TKM-70-1-W2<br>(AB752315)                     | 1 x 10 <sup>7</sup><br><i>Sulfurivirga</i> sp. TKM-55-1-W7<br>(AB752316)                                                                   |
| MMJYPS      | -                                                             | 1 x 10 <sup>4</sup><br>I.N.O. ( <i>Deferribacter</i> -like)            | 1 x 10 <sup>4</sup><br><i>Deferribacter</i> sp. TKM 55H-W4<br>(AB752313)                                                                   |

I.N.O, isolate not obtained after dilution counting.

N.T., not tested.

-, no growth.

## References in the supplementary materials

Balch, W.E., G.E. Fox, L.J. Magrum, C.R. Woese, and R.S. Wolfe. 1979. Methanogens: reevaluation of a unique biological group. *Microbiol. Rev.* 43:260-296.

DeLong, E.F. 1992. Archaea in coastal marine environments. *Proc. Natl. Acad. Sci. USA.* 89:5685–5689.

Hales, B.A., C. Edwards, D.A. Ritchie, G. Hall, R.W. Pickup, and J.R. Saunders 1996. Isolation and identification of methanogen-specific DNA from blanket bog peat by PCR amplification and sequence analysis. *Appl. Environ. Microbiol.* 62:668–675.

Lane, D.J. 1985. 16S-23S rRNA sequencing, p. 115-175. *In* E. Stackebrandt, and M. Goodfellow (ed.), *Techniques in Bacterial Systematics*. Wiley, Chichester.

Nunoura, T., H. Oida, J. Miyazaki, A. Miyashita, H. Imachi, and K. Takai. 2008. Quantification of *mcrA* by fluorescent PCR in methanogenic and anaerobic methanotrophic microbial communities. *FEMS Microbiol. Ecol.* 64:240-247.

Nunoura, T., H. Oida, M. Miyazaki, and Y. Suzuki 2008. *Thermosulfidibacter takaii* gen. nov. sp. nov. a thermophilic hydrogen oxidizing, sulfur reducing bacterium isolated from a deep-sea hydrothermal field, Southern Okinawa Trough within the phylum



*Aquificae*. Int J Syst Evol Microbiol. 58: 659-665.

Nunoura, T., H. Oida, M. Miyazaki, Y. Suzuki, K. Takai, and K. Horikoshi. 2007a. *Marinitoga okinawensis* sp. nov. a novel thermophilic and anaerobic heterotroph isolated from a deep-sea hydrothermal field, Southern Okinawa Trough. Int. J. Syst. Evol. Microbiol. 57: 467-471.

Nunoura, T., H. Oida, M. Miyazaki, Y. Suzuki, K. Takai, and K. Horikoshi. 2007b. *Desulfothermus okinawensis* sp. nov. a thermophilic and heterotrophic sulfate-reducing bacterium isolated from a deep-sea hydrothermal field. Int. J. Syst. Evol. Microbiol. 57:2360-2364

Nunoura, T., M. Hirai, H. Imachi, M. Miyazaki, H. Makita, H. Hirayama, Y. Furushima, H. Yamamoto, and K. Takai. 2010. *Kosmotoga arenicorallina* sp. nov. a thermophilic and obligately anaerobic heterotroph isolated from a shallow hydrothermal system occurring within a coral reef, southern part of the Yaeyama Archipelago, Japan, reclassification of *Thermococcoides shengliensis* as *Kosmotoga shengliensis* comb. nov., and emended description of the genus *Kosmotoga*. Arch. Microbiol. 192:811-819.

Takai, K. and K. Horikoshi. 2000. Rapid detection and quantification of members of the archaeal community by quantitative PCR using fluorogenic probes. Appl. Environ. Microbiol. 66:5066-5072.

Takai, K., F. Inagaki, S. Nakagawa, H. Hirayama, T. Nunoura, Y. Sako, K.H. Nealson, and K. Horikoshi 2003. Isolation and phylogenetic diversity of members of previously uncultivated epsilon-Proteobacteria in deep-sea hydrothermal fields. *FEMS Microbiol. Lett.* 218:167-174.

Takai, K., A. Inoue, and K. Horikoshi 2002. *Methanothermococcus okinawensis* sp. nov., a thermophilic, methane-producing archaeon isolated from a Western Pacific deep-sea hydrothermal vent system. *Int. J. Syst. Evol. Microbiol.* 52: 1089-1095.

Takai, K., A. Sugai, T. Itoh, and K. Horikoshi. 2000. *Palaeococcus ferrophilus* gen. nov., sp. nov., a barophilic, hyperthermophilic archaeon from a deep-sea hydrothermal vent chimney. *Int. J. Syst. Evol. Microbiol.* 50:489–500.
